# Supplementary material for: Efficacy of crizotinib and pemetrexed-based chemotherapy in Chinese NSCLC patients with ROS1 rearrangement
Source: PubMed Central journal article supplement (PMC5342729; doi:10.18632/oncotarget.12612), 2016-10-12
Supplement: oncotarget-07-75145-s001.pdf [file oncotarget-07-75145-s001.pdf]

# Efficacy of crizotinib and pemetrexed-based chemotherapy in Chinese NSCLC patients with *ROS1* rearrangement

## Supplementary Materials

### A *ROS1* (exon32); SLC34A2 (exon14 del):

*ROS1* exon32-TTTTACTCCCTTCTAGTAATTTGGGAATGCCTGGTTTATTGGGACTCCAG

CCTGAGCCTCTCTGCTAATGGTTATGTTATCAAAGGTCTCAGGAGCC-SLC34A2 exon14

del

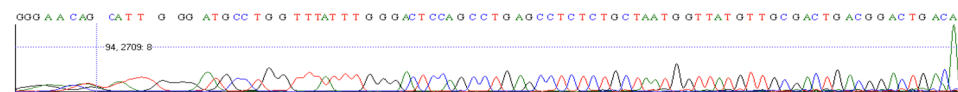

### B *ROS1* (exon32) ;CD74 (exon6):

*ROS1* exon32-TTTTACTCCCTTCTAGTAATTTGGGAATGCCTGGTTTATTGGGACTCCAG

CTTCGGTGGAGCGTCAGTGGGCTTTGCTCCAAGGAGTGCTGCTCAITTC-CD74

exon6

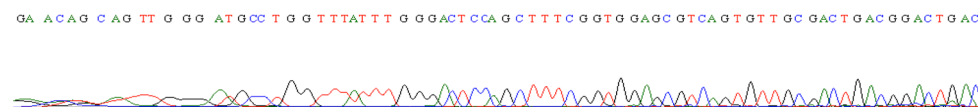

### C *ROS1* (exon32) ;SDC4 (exon2):

*ROS1* exon32-TTTTACTCCCTTCTAGTAATTTGGGAATGCCTGGTTTATTGGGACTCCAG

CCAGATCTCCAGAGCCAGACAGCTCAAAGTCATCAGAITCCTGCCCGGCC-SDC4

exon2

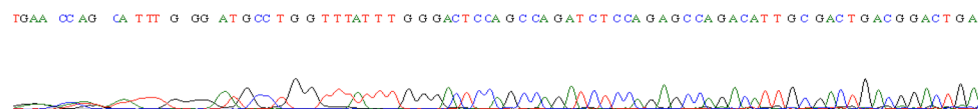

### D *ROS1* (exon32); SDC4 (exon4):

*ROS1* exon32-TTTTACTCCCTTCTAGTAATTTGGGAATGCCTGGTTTATTGGGACTCCAG

CTGCCAGGACCTCCGTTCTCTCAAAGATGTTGCTGCCCTGCACAGTGCTGG-SDC4

exon4

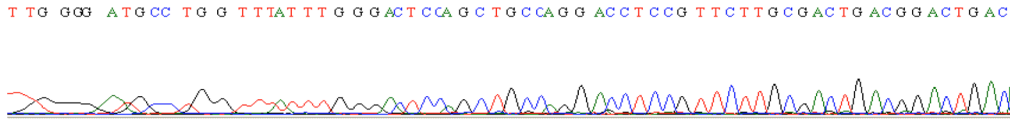

**E ROS1 (exon34) ;SLC34A2 (exon4):**

ROS1

exon34-TATTCCAAC TATAATAGTAAGTATGAAACTTGTTTCTGGTATCCAAAAATCAT

CTCCAACCAGCTGGAAGGCGCTACTAAGAATATCCAGGGAGCACACGAA-SLC34A2

exon4

T C M M M C Y W A T A A T A G T A A A G T A T G A A A C T T G T T T C T G G T A T C C A A A A A T C A T C T C C A A C C A G C T G A A G G C G C T A T T G C

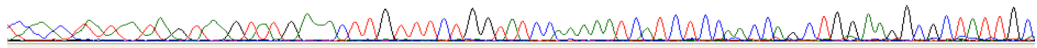

**F ROS1 (exon34); SLC34A2 (exon14 del):**

ROS1

exon34-TATTCCAAC TATAATAGTAAGTATGAAACTTGTTTCTGGTATCCAAAAATCAT

CCTGAGCCTCTCTGCTAATGGTTATGTIATCAAAGGTCTCAGGAGCC-SLC34A2 exon14

del

G A A G A T T C A C T A T A A T A G T A A G T A T G A A A C T T G T T T C T G G T A T C C A A A A A T C A T C C T G A G C C T C T G C T A A T G G T T G

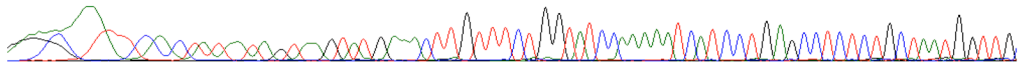

**G ROS1 (exon34); CD74 (exon6):**

ROS1

exon34-TATTCCAAC TATAATAGTAAGTATGAAACTTGTTTCTGGTATCCAAAAATCAT

CTTTCGGTGGAGCGTCAGTGGGCTTTGCTCCAAGGAGTGCCTGCTCATTTC-CD74

exon6

T G C A T T C C A C T A T A A T A G T A A G T A T G A A A C T T G T T T C T G G T A T C C A A A A A T C A T C T T T C G G T G G A G C G T C A T T G C G A C T G

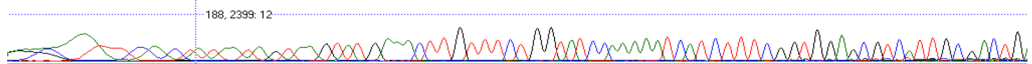



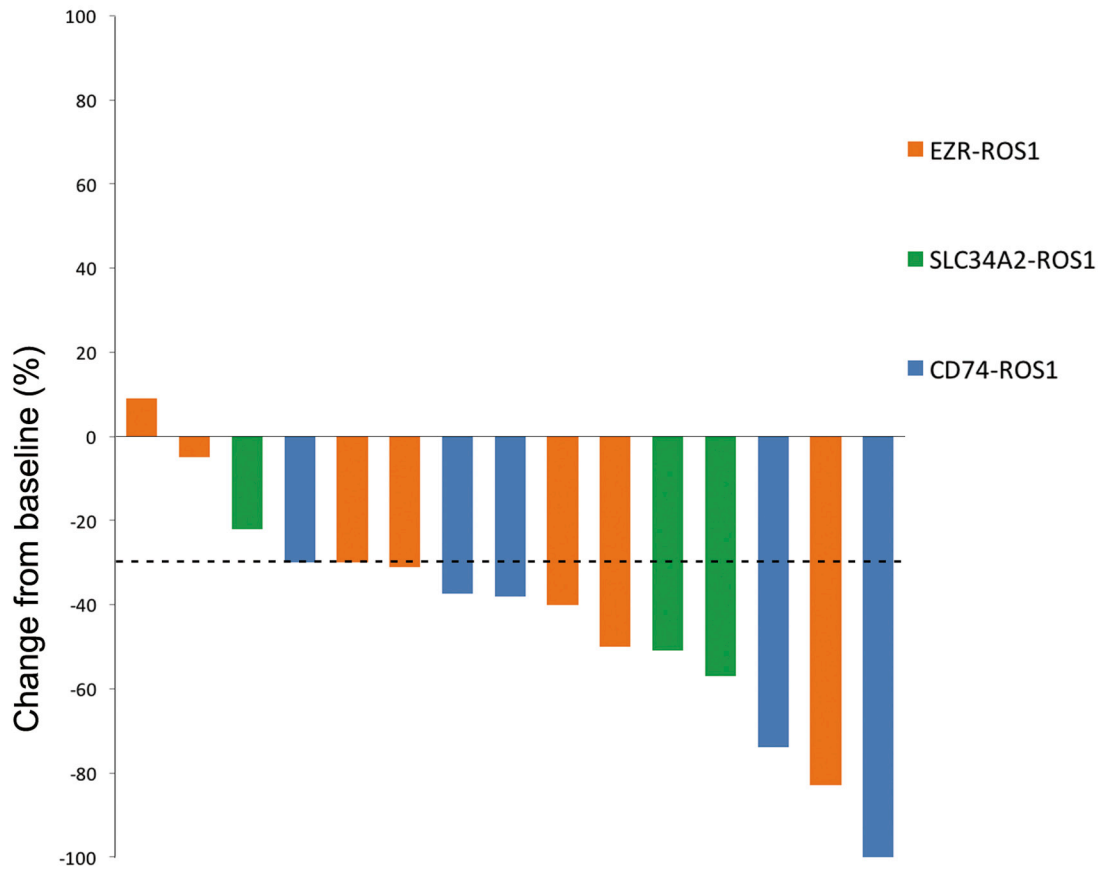

Supplementary Figure S2: Waterfall plot of best percent change from baseline of target lesions for 15 *ROS1* fusion-positive patients with *EZR-ROS1*, *SLC34A2-ROS1*, *CD74-ROS1* fusion patterns, respectively.
